# Supplementary material for: Quantitative metaproteomics of medieval dental calculus reveals individual oral health status
Source: PubMed Central journal article supplement (PMC6246597; doi:10.1038/s41467-018-07148-3), 2018-11-20
Supplement: 41467_2018_7148_MOESM3_ESM.pdf [file 41467_2018_7148_MOESM3_ESM.pdf]

## **Description of Additional Supplementary Files**

**File Name:** Supplementary Data 1

**Description:** All bacterial genera identified

**File Name:** Supplementary Data 2

**Description:** All bacterial species identified
